# Supplementary material for: Improving the management of patients with acute red eyes in a large London Emergency Department
Source: HighWire-hosted journal article supplement (doi:10.1136/bmjquality.u201656.w1962), 2014-01-01
Supplement: ds3405.pdf [file ds3405.pdf]

# **Survey results, pre-intervention data and original pro forma**

*Improving the management of patients with acute red eyes in a large London Accident and Emergency Department*

## FY2 Confidence in Managing Common A&E Presentations

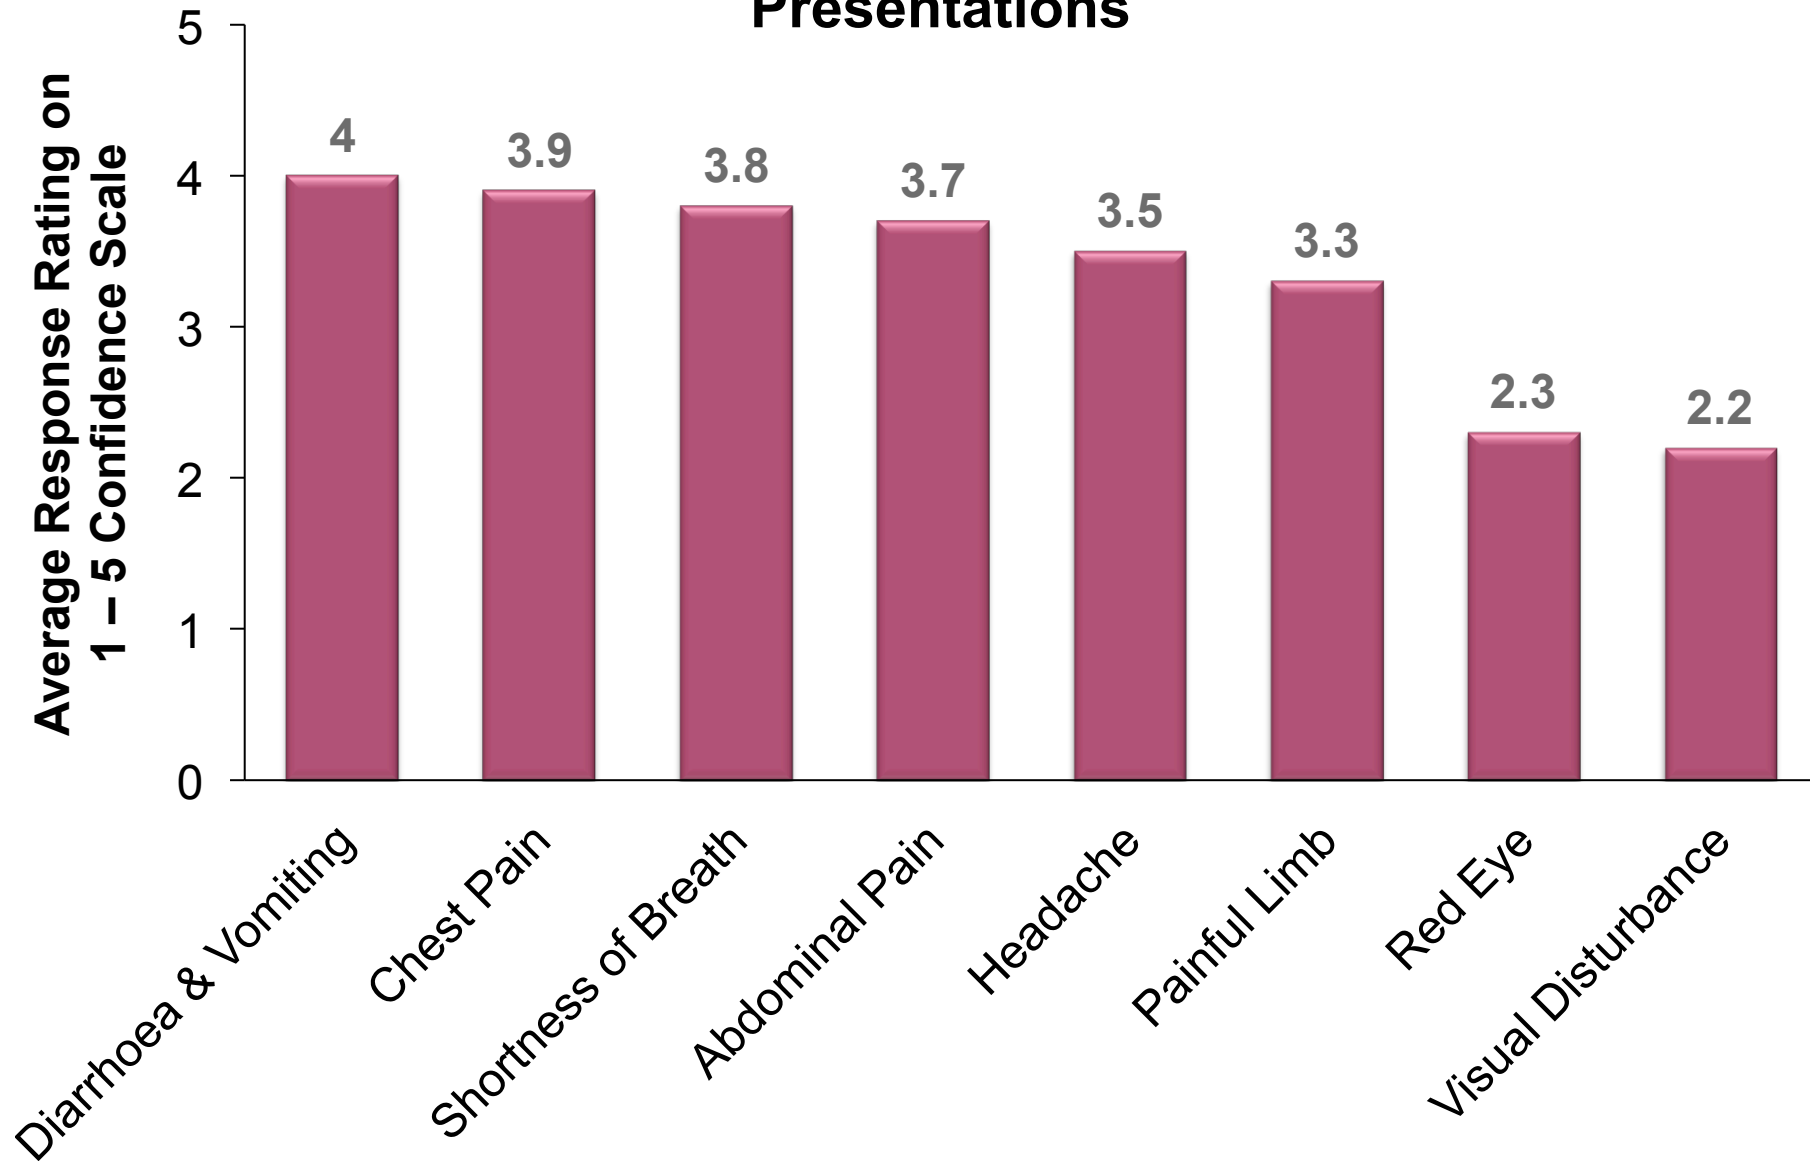

# **PRE-INTERVENTION DATA**

# Contact lens status documentation and relationship to pro forma use

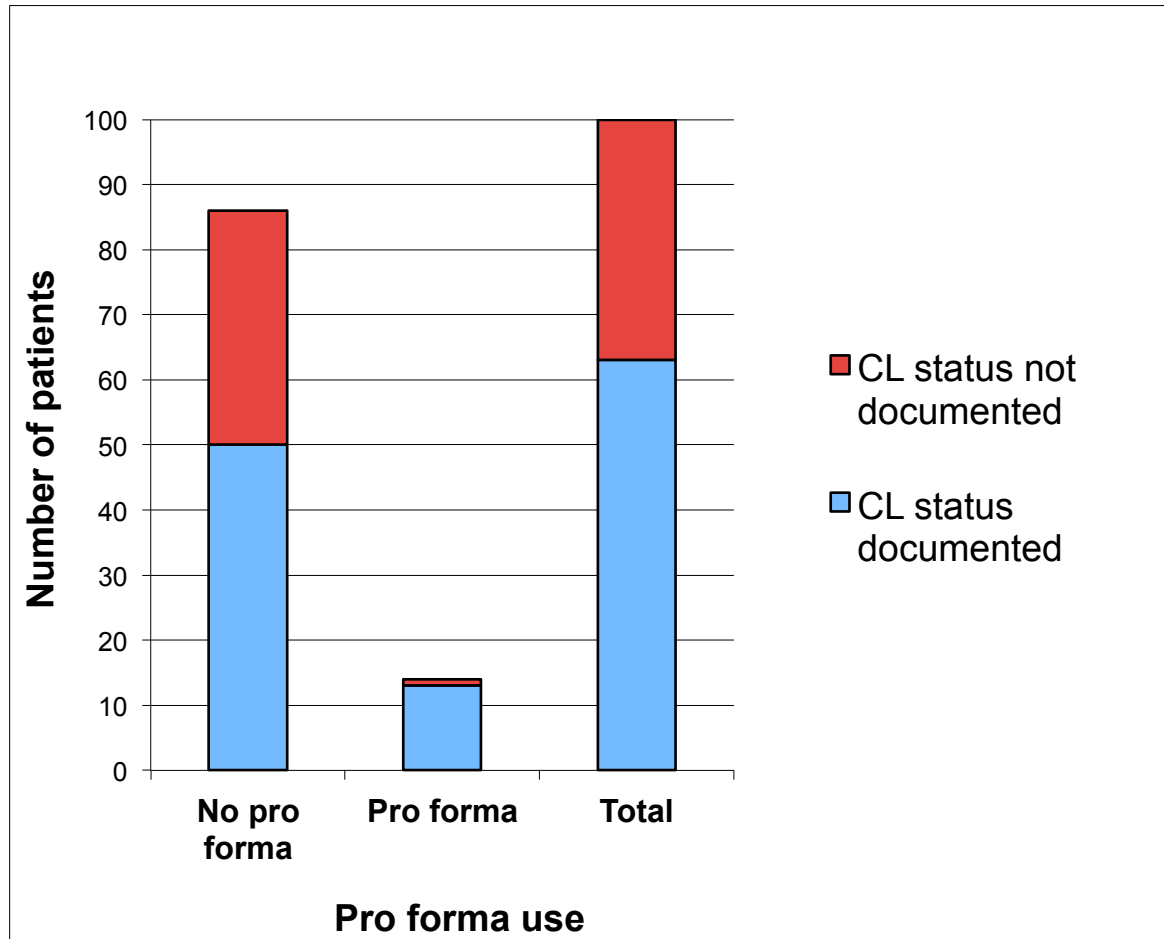

# Visual acuity documentation

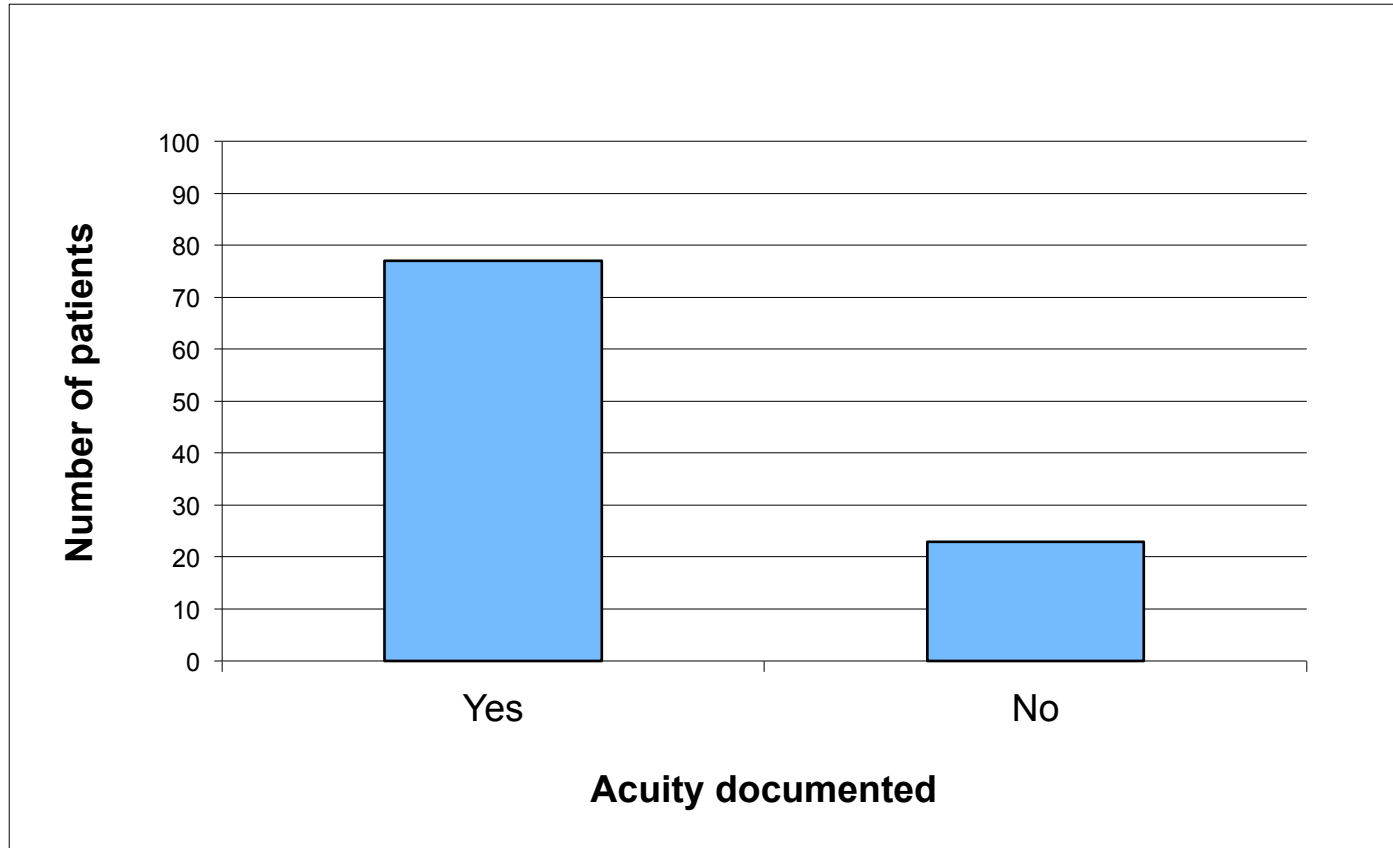

**Use of patient's normal glasses or contact lenses when examining acuity (n = 52)**

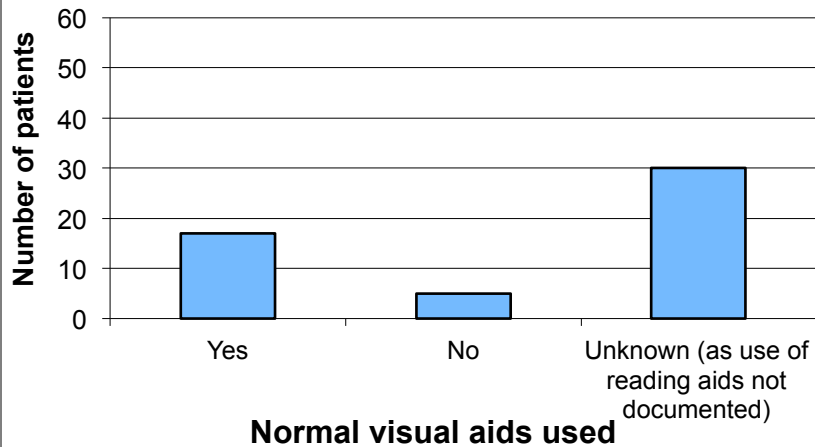

**Use of fluorescein staining**

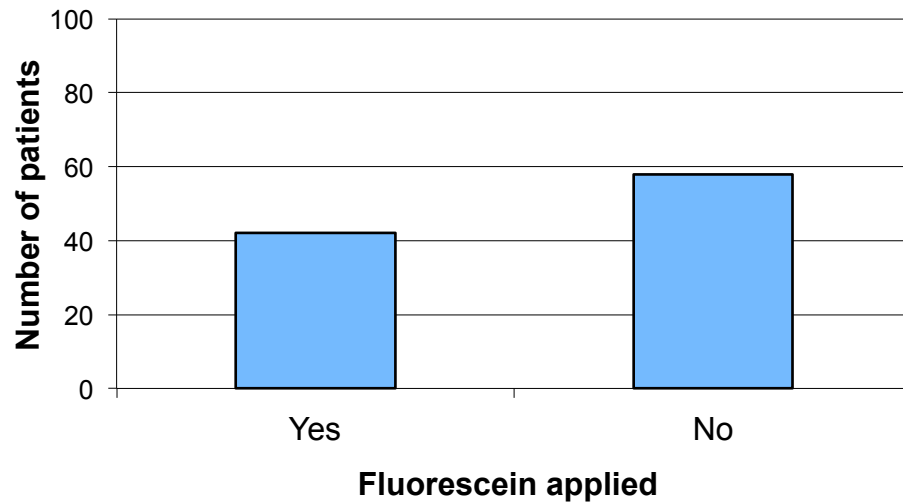

**Use of pinhole correction when examining acuity if acuity  $\leq 6/9$  (n = 55)**

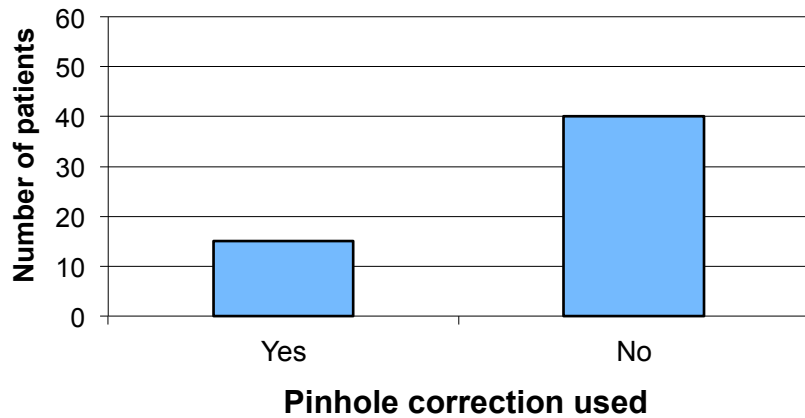

**Use of slit lamp**

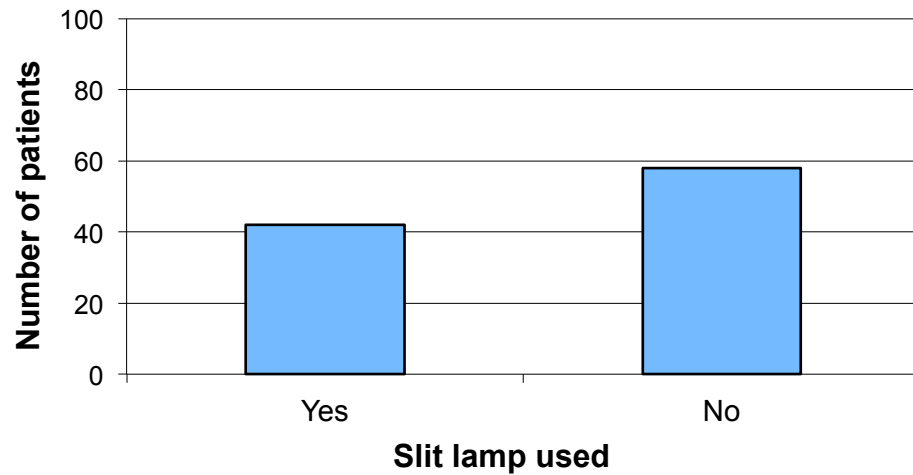

# Antibiotics

**In patients who needed antibiotics,  
was CL status known?**

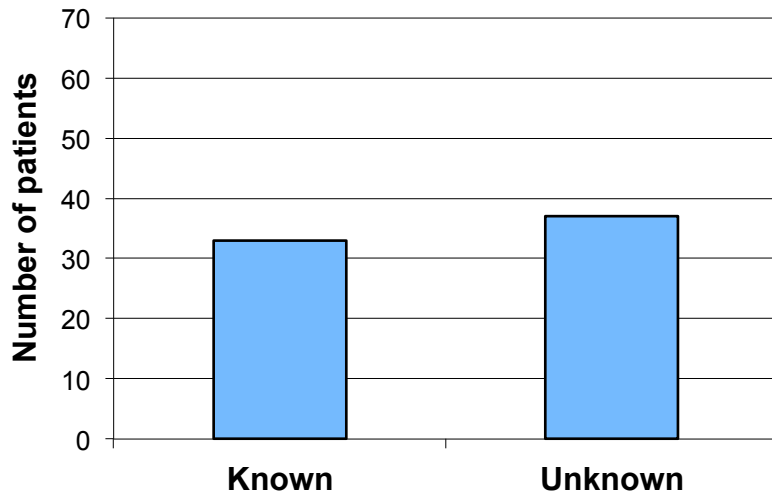

**Correct prescription of antibiotics, as per  
Trust guidelines**

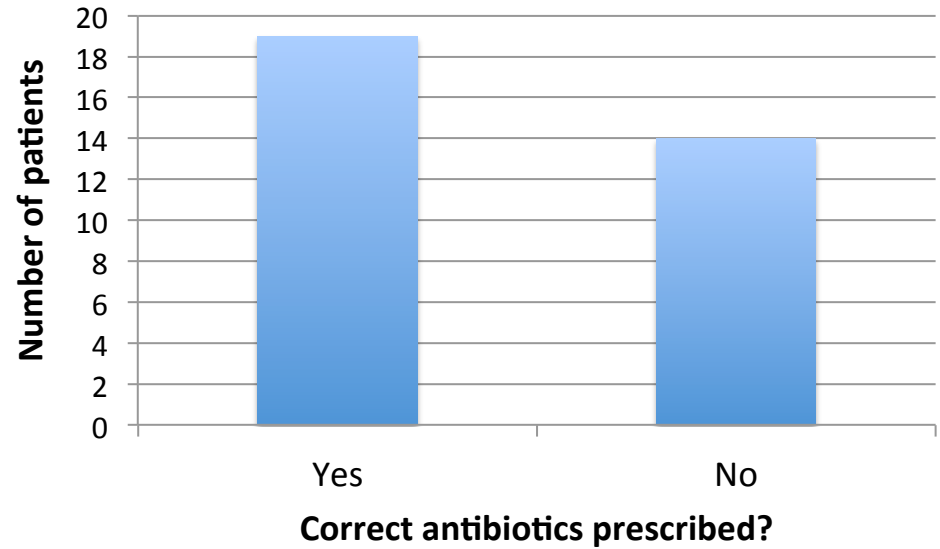

### Follow-up or safety net documented?

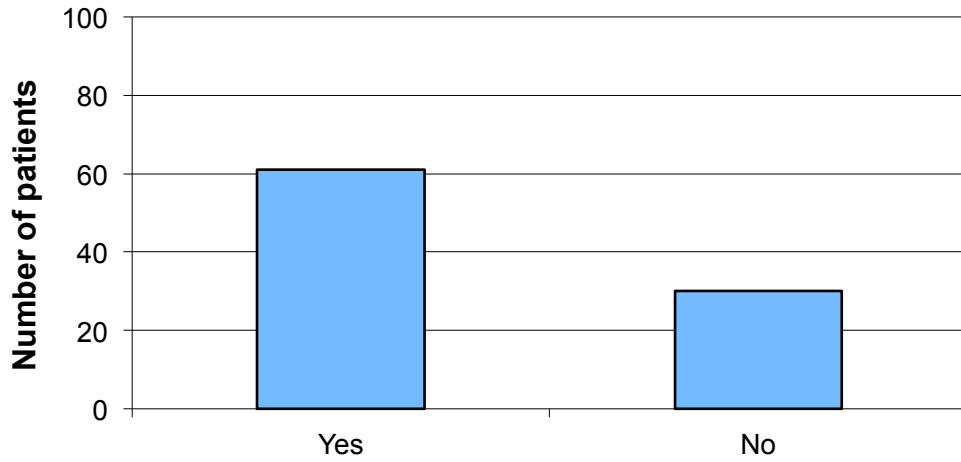

### Ophthalmology referrals

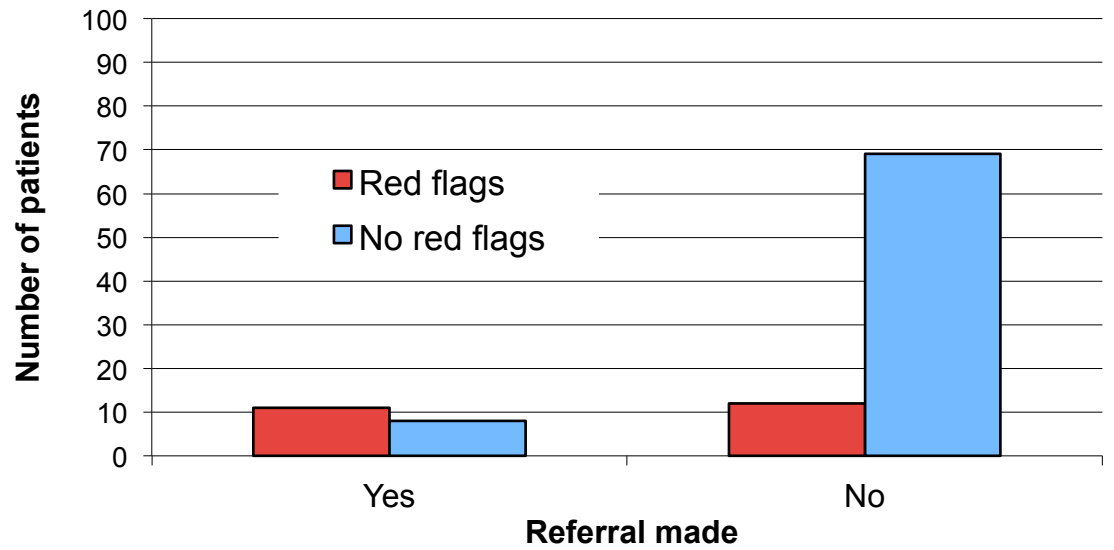



# Old clerking pro forma

## Eye Documentation Sheet

King's College Hospital   
NHS Foundation Trust

Patient name: \_\_\_\_\_  
Hospital No. \_\_\_\_\_ Date: \_\_\_\_\_ Time: \_\_\_\_\_ Practitioner: \_\_\_\_\_

| History | Age: | ♂ / ♀ | Occupation: | Indicate source of history if not the patient:                                                                                                                           |
|---------|------|-------|-------------|--------------------------------------------------------------------------------------------------------------------------------------------------------------------------|
| PC      |      |       |             | Myopic (shortsighted) Yes / No Details: _____<br>Hypermetropic (longsighted) Yes / No Details: _____<br>Wears Glasses Yes / No Wears Contact Lenses Yes / No Type: _____ |

**HPC / Mechanism:** Date/Time of injury/symptom onset: \_\_\_\_\_ Side: Left / Right: \_\_\_\_\_ Visual disturbance (e.g. floaters, flashing lights, visual field loss e.t.c.) \_\_\_\_\_

| PMH (including eye Hx): | Medications: |
|-------------------------|--------------|
|                         |              |

**SH:** \_\_\_\_\_

| Allergies: | ATT status: |
|------------|-------------|
|            |             |

**Examination:** Temp \_\_\_\_\_ P. \_\_\_\_\_ BP \_\_\_\_\_ RR \_\_\_\_\_ Other: \_\_\_\_\_ (As appropriate)

**General:**

| Visual acuity:          | Right | Left |
|-------------------------|-------|------|
| Unaided:                |       |      |
| Glasses/Contact Lenses: |       |      |
| Pin Hole:               |       |      |
| pH:                     |       |      |
| Intraocular Pressure:   |       |      |

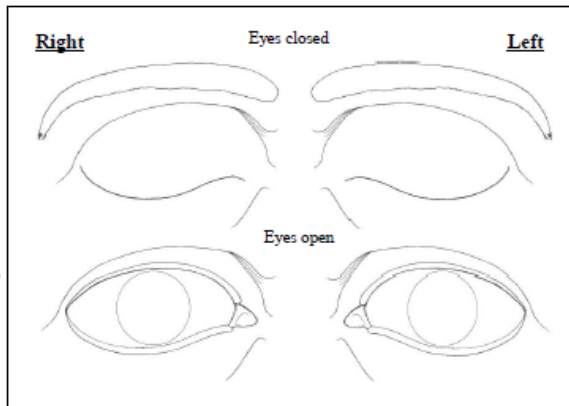

\* Visual disturbance (e.g. diplopia, floaters, flashing lights, visual field loss or shadows etc): Yes / No Details: \_\_\_\_\_  
\_\_\_\_\_

\* Photophobia: Yes / No \* Watery: Yes / No \* Discharge: Yes / No Details: \_\_\_\_\_  
\* Pain / Discomfort / Itching: Yes / No Details: \_\_\_\_\_  
\* Eye position symmetrical: Yes / No Details: \_\_\_\_\_  
\* Eye movements normal (+ note any diplopia on testing): Yes / No Details: \_\_\_\_\_

**Peri-Orbital Area:** \* Wounds: Yes / No \* Bruising: Yes / No \* Swelling: Yes / No \* Erythema: Yes / No  
\* Lesions: Yes / No Details: \_\_\_\_\_

**Eyelids & Lashes:** \* Wounds: Yes / No \* Bruising: Yes / No \* Swelling: Yes / No \* Lesions: Yes / No  
\* Crusting: Yes / No \* Ptosis: Yes / No \* Blepharospasm: Yes / No \* Erythema: Yes / No  
\* Infestation: Yes / No \* Ectropion: Yes / No \* Entropion: Yes / No Details: \_\_\_\_\_

**Conjunctiva / Sclera:** \* Injection: Yes / No \* FBs (+ sub tarsal): Yes / No \* Chemosis: Yes / No  
\* Papillae: Yes / No \* Pinguaculae: Yes / No \* Cysts: Yes / No  
\* Pterygia: Yes / No \* Subconjunctival haemorrhage: Yes / No \* Ciliary Flush: Yes / No  
\* Follicles: Yes / No Details: \_\_\_\_\_

**Cornea (+/- Fluorescein stain):** \* Clear: Yes / No \* Wounds: Yes / No \* Abrasions: Yes / No \* Ulcers: Yes / No  
\* FBs: Yes / No Details: \_\_\_\_\_

**Anterior Chamber:** \* Hyphaema: Yes / No \* Hypopyon: Yes / No \* Keratic precipitates: Yes / No  
\* Inflammatory cells: Yes / No \* Posterior synechiae: Yes / No \* FB: Yes / No  
Details: \_\_\_\_\_

**Iris & Pupils:** \* PERL: Yes / No \* Regular shape: Yes / No Details: \_\_\_\_\_

Notes: \_\_\_\_\_  
\_\_\_\_\_  
\_\_\_\_\_  
\_\_\_\_\_  
\_\_\_\_\_

**Impression:** \_\_\_\_\_

| Investigations: | Results: |
|-----------------|----------|
|                 |          |

**Treatment / Advice:** (Please tick) Verbal & written advice  **TTAs / Prescription:** \_\_\_\_\_  
Other: \_\_\_\_\_  
\_\_\_\_\_  
\_\_\_\_\_

**Disposal:** A&E SOS GP Eye clinic Other: \_\_\_\_\_  
**Signature, name and designation:** \_\_\_\_\_
